# Supplementary material
Source: publisher figshare collection journal article supplement (https://gsajournals.figshare.com/articles/dataset/_/7871780)
Supplement: Supplementary file 1 [file 7871780]

**A**

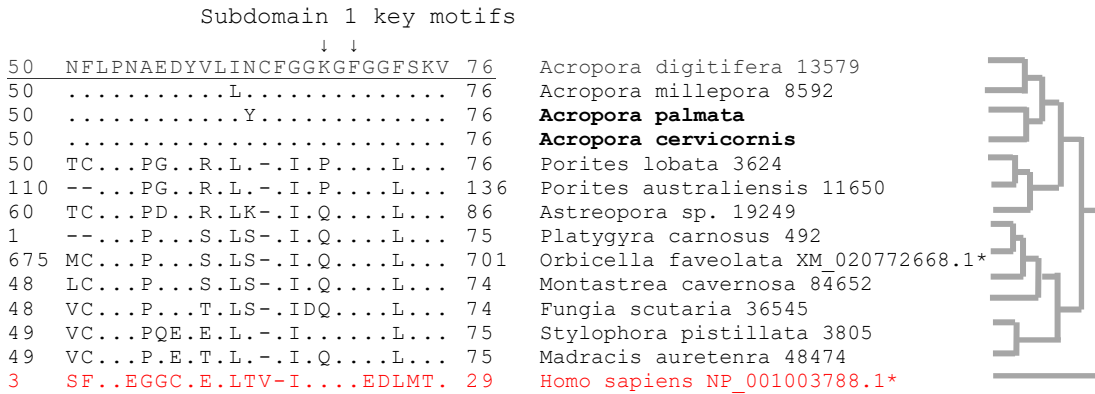

**B**

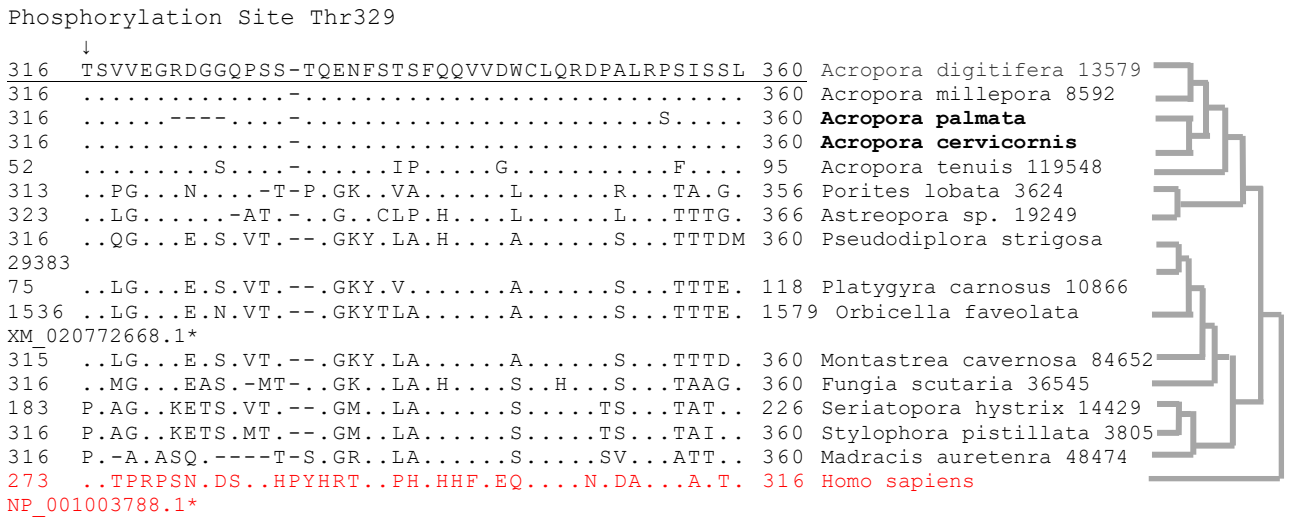

**Figure S6. STE20-related kinase adapter protein alpha isoform 4 (STRAD $\alpha$ ) truncated alignment of *A. digitifera* protein Reef Genomics: *Acropora digitifera*\_13579) with coral sequences and human NP\_001003788.1 to highlight fixed SNVs and indel in *A. palmata*. The first fixed substitution is a N  $\rightarrow$  Y (A) and second fixed substitution is P  $\rightarrow$  S (B). The unique deletion in *A. palmata* is indicated (B). Conserved residues in the glycine-rich loop and one of the two phosphorylation sites for STRAD $\alpha$  (Baas et al. 2003) are shown by the arrows in panel A and B, respectively. A dot ‘.’ indicates identity to the *A. digitifera* residue. Samples with an asterisk (\*) are from NCBI and all others are from Reef Genomics database.**
