# Supplementary material
Source: publisher figshare collection journal article supplement (https://gsajournals.figshare.com/articles/dataset/_/7871780)
Supplement: Supplementary file 3 [file 7871780]

**Supplemental Table 3.** Summary of the eight fixed SNV markers used to assign unknown hybrids and species. For each SNV, the left nucleotide matches *A. cervicornis* and the right nucleotide matches *A. palmata*. The fragment sizes following enzymatic digestion are presented as smallest/largest.

| Scaffold ID    | Position | SNV   | Locus Type | Forward Primer        | Reverse Primer       | Product Size (bp) | Restriction Enzyme | Taxon Specificity | Fragment Sizes |
|----------------|----------|-------|------------|-----------------------|----------------------|-------------------|--------------------|-------------------|----------------|
| NW_015441368.1 | 282878   | [G/A] | CDS        | ATCTCACAAGTGCTGCAGCT  | TTGCCTAACAGCAGTCCCAG | 133               | HaeIII             | cerv              | 50/83          |
| NW_015441107.1 | 416007   | [C/A] | Intergenic | GCGCGACCACACAAATGTTA  | ACGTCTGAAACTGCCGACAT | 245               | DpnII              | palm              | 72/174         |
| NW_015441104.1 | 839560   | [A/G] | CDS        | AAGCCTCGTTTGCCCTCTCTC | TGTTCTGGTTTTGCTGCAGC | 268               | HinfI              | palm              | 96/172         |
| NW_015441068.1 | 984261   | [G/A] | CDS        | AACCTGACGCACGAGACATT  | TTTCCGCCGCAACAGATTTG | 343               | EcoRV              | palm              | 127/215        |
| NW_015441140.1 | 378360   | [A/G] | CDS        | GGCGAGCCACCTGAAACAAT  | TTACTTTCAGGGTCGGCTGC | 253               | HpyCH4IV           | palm              | 80/173         |
| NW_015441368.1 | 214083   | [G/A] | CDS        | AAGCACTTCCTTCTCCAGC   | TTGGGCTGCTACTTGGGATG | 438               | HpyCH4IV           | cerv              | 173/265        |
| NW_015441435.1 | 299429   | [G/A] | CDS        | TAGGTCAGCGTTTCACCAC   | AGCTGATCTTCTTGTGGGCT | 177               | HpyCH4IV           | cerv              | 71/106         |
| NW_015441058.1 | 360162   | [T/C] | CDS        | CCTGAGCCTCAGTCTCGTTG  | AAGTGCACCAGGTCTGCTTT | 434               | HpyCH4IV           | cerv              | 99/335         |
