# Supplementary material
Source: publisher figshare collection journal article supplement (https://gsajournals.figshare.com/articles/dataset/_/7871780)
Supplement: Supplementary file 4 [file 7871780]

**Table S5. Gene models identified in the two highest scoring  $F_{ST}$  intervals between the 20 samples of *A. cervicornis* and *A. palmata*.**

| <i>A. digitifera</i><br>Scaffold | Interval                         | Score           | <i>A. digitifera</i><br>Gene Accession | <i>A. digitifera</i><br>Scaffold Positions | Gene<br>Abbreviation | Gene Annotation                                     |
|----------------------------------|----------------------------------|-----------------|----------------------------------------|--------------------------------------------|----------------------|-----------------------------------------------------|
| NW_015441181.1                   | 53,856..54,305<br>64,603..78,897 | 0.487<br>20.398 | LOC107339089                           | 46,318..55,769                             | LOC107339089         | uncharacterized LOC107339089                        |
|                                  |                                  |                 | LOC107339088                           | 63,831..65,833                             | MTL12                | methyltransferase-like protein 12,<br>mitochondrial |
|                                  | 80,959..81,640<br>90,865..91,096 | 0.180<br>0.923  | LOC107339060                           | 71,376..74,611                             | WIF1                 | wnt inhibitory factor 1-like                        |
|                                  |                                  |                 | LOC107339062                           | 75,065..99,087                             | MUC5AC               | mucin-5AC-like                                      |
|                                  |                                  |                 | LOC107339062                           | 75,065..99,087                             | MUC5AC               | mucin-5AC-like                                      |
| NW_015441116.1                   | 425,029..425,392                 | 0.384           |                                        |                                            |                      |                                                     |
|                                  | 425,607..426,148                 | 0.410           |                                        |                                            |                      |                                                     |
|                                  | 427,041..427,172                 | 0.410           |                                        |                                            |                      |                                                     |
|                                  | 430,076..430,596                 | 0.513           |                                        |                                            |                      |                                                     |
|                                  | 430,721..431,578                 | 0.820           |                                        |                                            |                      |                                                     |
|                                  | 431,676..432,032                 | 0.384           |                                        |                                            |                      |                                                     |
|                                  | 432,577..436,300                 | 2.409           | LOC107334418                           | 434,950..436,494                           | GPCR9                | G-protein coupled receptor No9                      |
|                                  | 437,575..437,698                 | 0.309           |                                        |                                            |                      |                                                     |
|                                  | 442,375..444,578                 | 0.665           |                                        |                                            |                      |                                                     |
|                                  | 444,744..445,527                 | 1.283           |                                        |                                            |                      |                                                     |
|                                  | 445,692..446,438                 | 0.461           |                                        |                                            |                      |                                                     |
|                                  | 447,289..462,570                 | 15.995          | LOC107334364                           | 447,296..458,717                           | PDIA5                | protein disulfide-isomerase A5-like                 |
|                                  |                                  |                 | LOC107334366                           | 459,123..462,401                           | TXNDC                | thioredoxin domain-containing protein<br>12-like    |
|                                  | 463,276..464,640                 | 0.538           | LOC107334421                           | 463,853..467,911                           | TXNDC                | thioredoxin domain-containing protein<br>12-like    |
|                                  | 464,997..465,398                 | 0.333           | LOC107334421                           | 463,853..467,911                           | TXNDC                | thioredoxin domain-containing protein<br>12-like    |
|                                  | 466,870..467,160                 | 0.333           | LOC107334421                           | 463,853..467,911                           | TXNDC                | thioredoxin domain-containing protein<br>12-like    |
|                                  | 469,143..469,628                 | 0.384           | LOC107334367                           | 468,913..477,415                           | ABHD14B              | ABHD14B-like                                        |
|                                  | 473,491..473,884                 | 0.332           | LOC107334367                           | 468,913..477,415                           | ABHD14B              | ABHD14B-like                                        |
