# Supplementary material
Source: publisher figshare collection journal article supplement (https://gsajournals.figshare.com/articles/dataset/_/7871780)
Supplement: Supplementary file 5 [file 7871780]

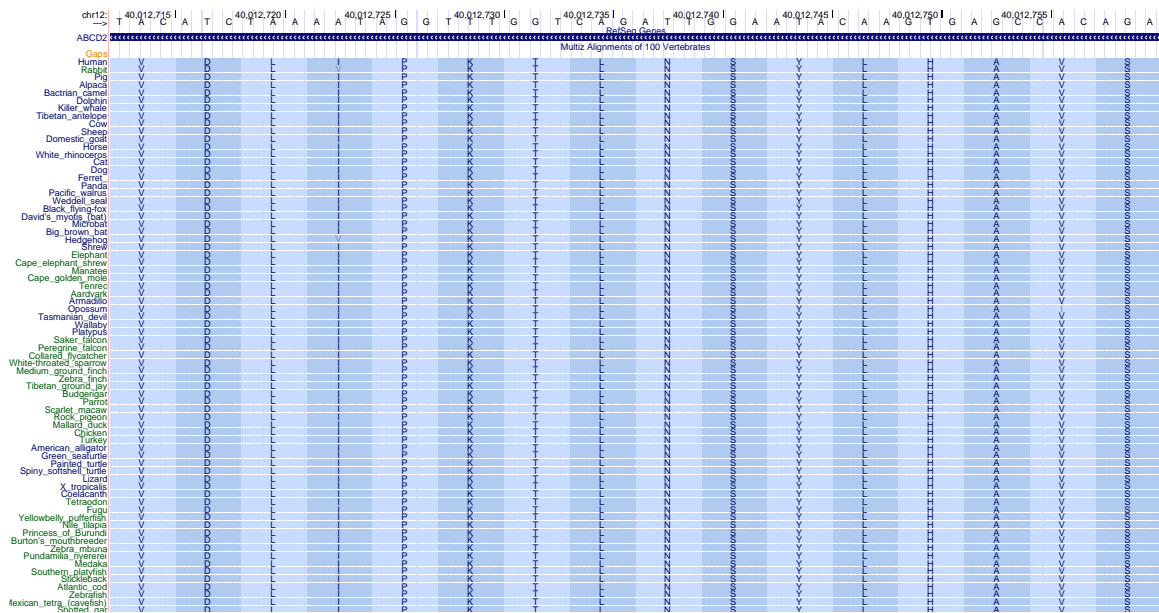

**Figure S11. Extreme conservation in vertebrates of the motif SVAHLYSNLTKPILDV in ATP-binding cassette sub-family D member 2 (the human gene is transcribed right-to-left).** The V in SVAH appears conserved in corals, but is replaced by I in *A. palmata* and the Opossum. We have omitted other primates and euarchontoglires (e.g., mouse), but included rabbit because it has one difference. The image was prepared at the UCSC Genome Browser.
