# Supplementary material
Source: publisher figshare collection journal article supplement (https://gsajournals.figshare.com/articles/dataset/_/7871780)
Supplement: Supplementary file 7 [file 7871780]

**A**

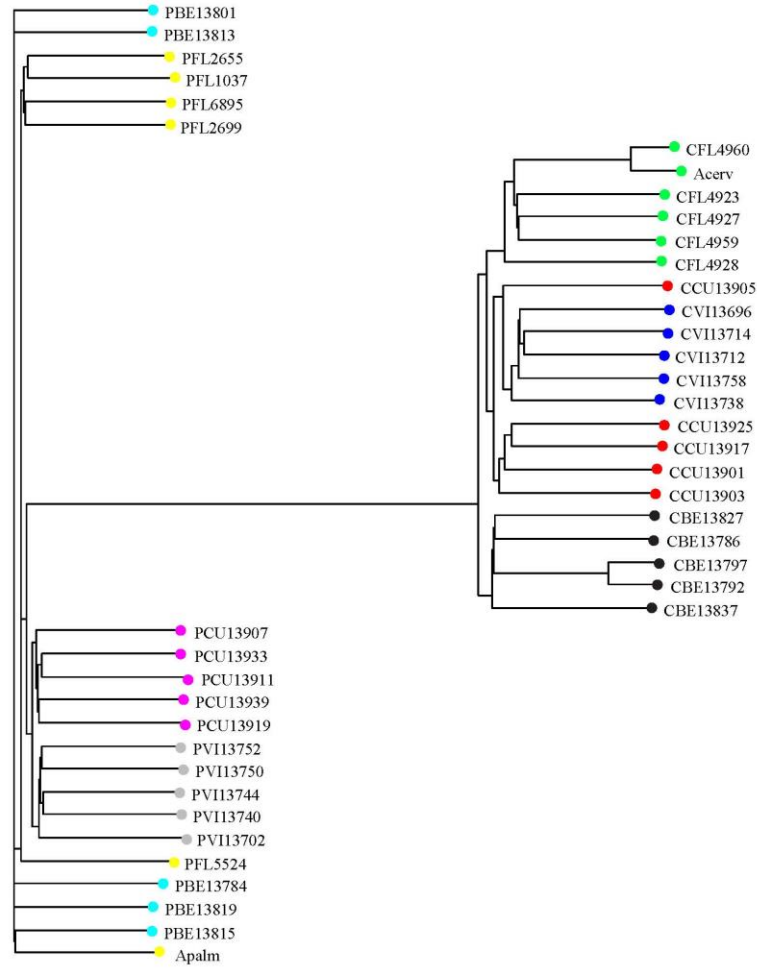

**Figure S2. Distance-based phylogenetic tree (A) and identity-by-state (B) of the 42 newly sequenced *Acropora* samples.** In the tree (A) and dendrogram (B), *A. cervicornis* (names starting with C) clearly separates from *A. palmata* (names starting with P). Samples from the same location (indicated by the second and third letters of the name) group together within species. The analyses are based on the 1,692,739 SNVs described in the main paper and was prepared with “Phylogenetic Tree” Galaxy command under “Genome Diversity” tools (Bedoya-Reina et al. 2013) or SNPRelate (Zheng et al. 2012).

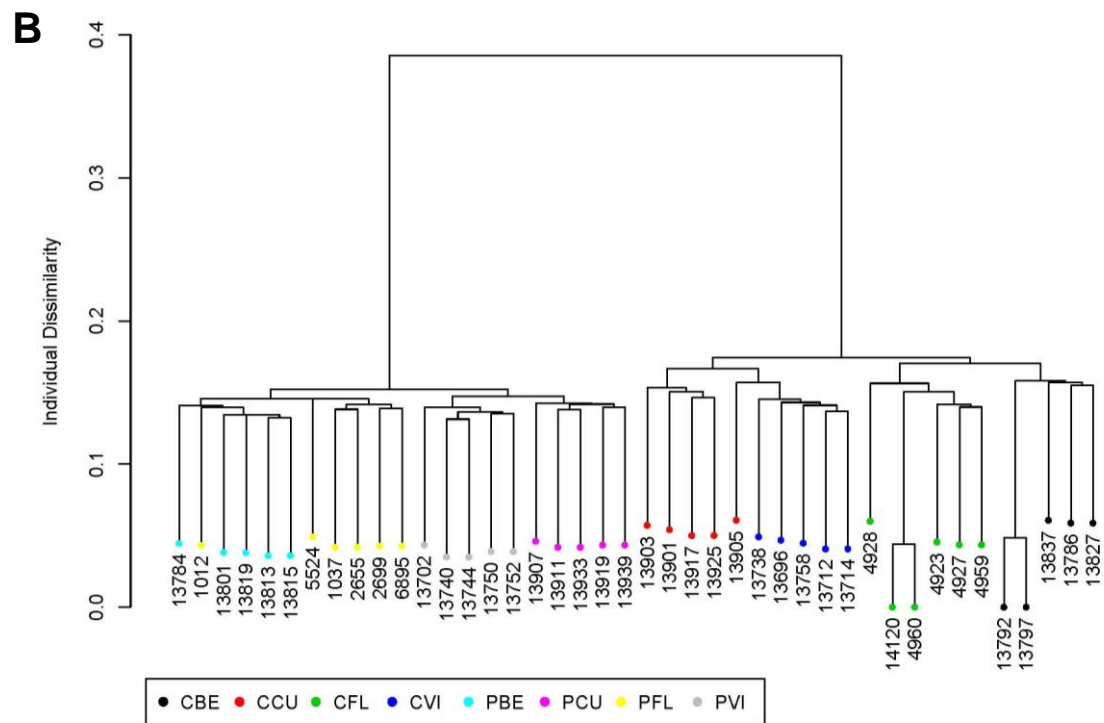

**Figure S2.** Continued.
