# Supplementary material
Source: publisher figshare collection journal article supplement (https://gsajournals.figshare.com/articles/dataset/_/7871780)
Supplement: Supplementary file 8 [file 7871780]

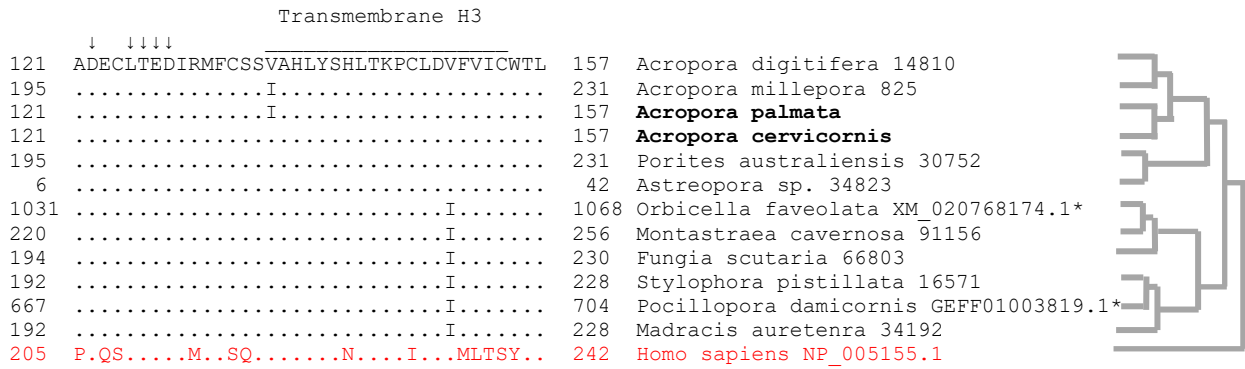

**Figure S10. ATP-binding cassette sub-family D member 2 alignment of several coral sequences and human orthologue (GenBank: NP\_005155.1).** In *A. palmata* and *A. millepora*, the transition from V → I is not found in other surveyed corals. It appears that the same V → I substitution occurred multiple times in the acroporids. In several species from the robust corals, a neighboring V has also been replaced by I. The substitutions are within transmembrane helices 3 (H3), but not at the conserved residues suspected to play a role in protein stabilization and transport (Andreoletti et al. 2017). A dot ‘.’ indicates identity to the column’s *A. digitifera* residue. Samples with an asterisk (\*) are from NCBI and all others are from Reef Genomics database.
