# Supplementary material
Source: publisher figshare collection journal article supplement (https://gsajournals.figshare.com/articles/dataset/_/7871780)
Supplement: Supplementary file 9 [file 7871780]

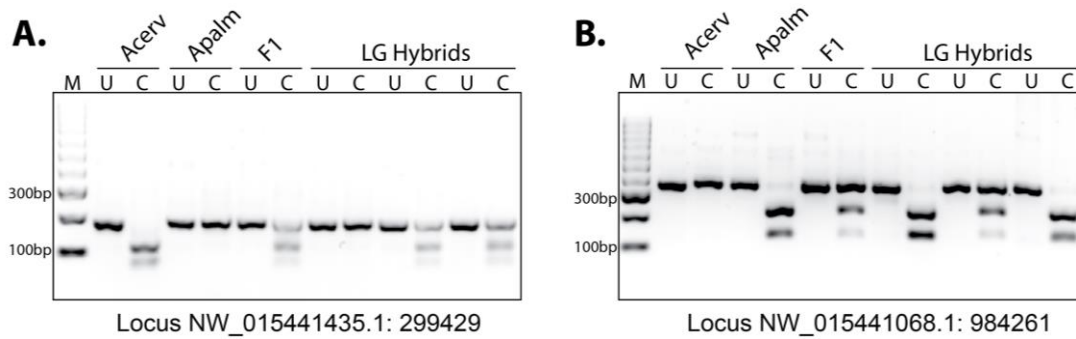

**Figure S13. RFLP results for parental species and hybrids for two fixed SNV loci.**

The restriction fragment length polymorphism results of two loci, locus NW\_015441435.1: 299429 that cuts *A. cervicornis* (A) and locus NW\_015441068.1: 984261 that cuts *A. palmata* (B), are displayed in order from left to right for *A. cervicornis* genome sample 13696, *A. palmata* genome sample 13815, F1 hybrid sample 8939, and three later generation (LG) hybrid samples 4062, 6791, and 1302. Each lane is labeled as either marker= M, uncut PCR product = U, or cut PCR product = C. The LG hybrid 1302 presents both heterozygous (A) and homozygous (B) alleles, whereas LG hybrid 6791 is heterozygous and 4062 is homozygous for both loci.
