# Supplementary material
Source: publisher figshare collection journal article supplement (https://gsajournals.figshare.com/articles/dataset/_/7871780)
Supplement: Supplementary file 10 [file 7871780]

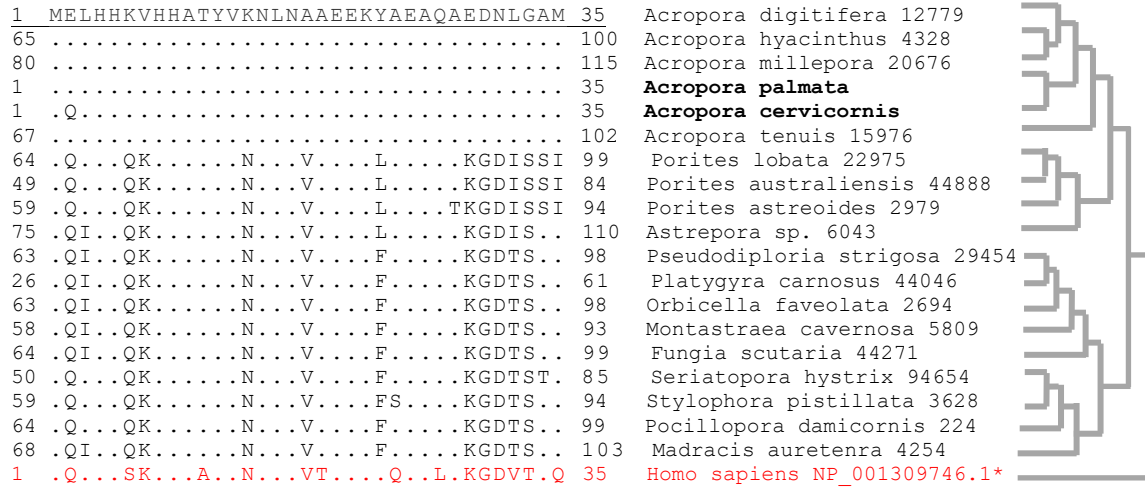

**Figure S4. Superoxide dismutase alignment highlighting the SNV between *A. cervicornis* and *A. digitifera* (Reef Genomics:12779).** This variant agrees with human orthologue (GenBank: NP\_001309746.1). It also agrees with genes from a number of non-*Acropora* coral species. A dot ‘.’ indicates identity to the *A. digitifera* residue. Samples with an asterisk (\*) are from NCBI and all others are from Reef Genomics database.
