# Supplementary material
Source: publisher figshare collection journal article supplement (https://gsajournals.figshare.com/articles/dataset/_/7871780)
Supplement: Supplementary file 11 [file 7871780]

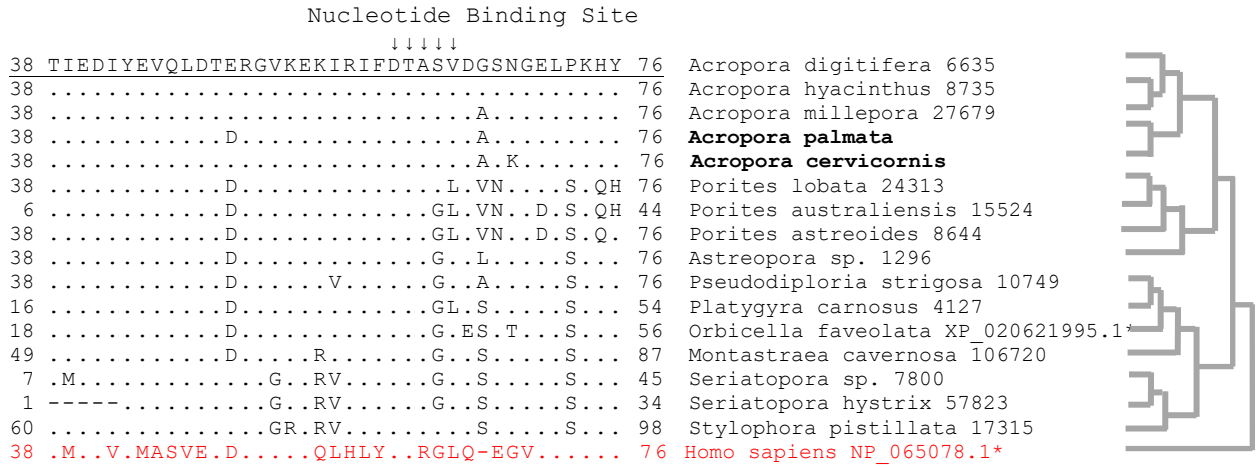

**Figure S5. Alignment of NF-kappa-B inhibitor-interacting Ras-like protein 1 from *Acropora digitifera*\_6635 to sequences from other corals and the human orthologue (GenBank: NP\_065078.1).** We have annotated the locations of a fixed E → D substitution in *A. palmata*, which may have been the ancestral form, and a fixed N → K substitution that is unique to *A. cervicornis*. The nucleotide binding motif is shown by the arrows. A dot ‘.’ indicates identity to the *A. digitifera* residue. Samples with an asterisk (\*) are from NCBI and all others are from Reef Genomics database.
