# Supplementary material
Source: publisher figshare collection journal article supplement (https://gsajournals.figshare.com/articles/dataset/_/7871780)
Supplement: Supplementary file 15 [file 7871780]

**Table S4. Fixed SNV marker gene annotation.**

| <b>Scaffold ID</b> | <b>Position</b> | <b>Annotation</b>                                                            |
|--------------------|-----------------|------------------------------------------------------------------------------|
| NW_015441368.1     | 282878          | eIF-2-alpha kinase activator GCN1-like (XM_015913703.1)                      |
| NW_015441107.1     | 416007          |                                                                              |
| NW_015441104.1     | 839560          | uncharacterized LOC107333364 (XM_015898184.1)                                |
| NW_015441068.1     | 984261          | uncharacterized LOC107347860 (XM_015913837.1)                                |
| NW_015441140.1     | 378360          | fibroblast growth factor receptor 2-like (XM_015901381.1)                    |
| NW_015441368.1     | 214083          | bis(5'-nucleosyl)-tetraphosphatase PrpE [asymmetrical]-like (XM_015913720.1) |
| NW_015441435.1     | 299429          | adenosine receptor A3-like (XM_015916051.1)                                  |
| NW_015441058.1     | 360162          | U3 small nucleolar RNA-associated protein 6 homolog (XM_015923233.1)         |
