# Supplementary material
Source: publisher figshare collection journal article supplement (https://gsajournals.figshare.com/articles/dataset/_/7871780)

NBDs

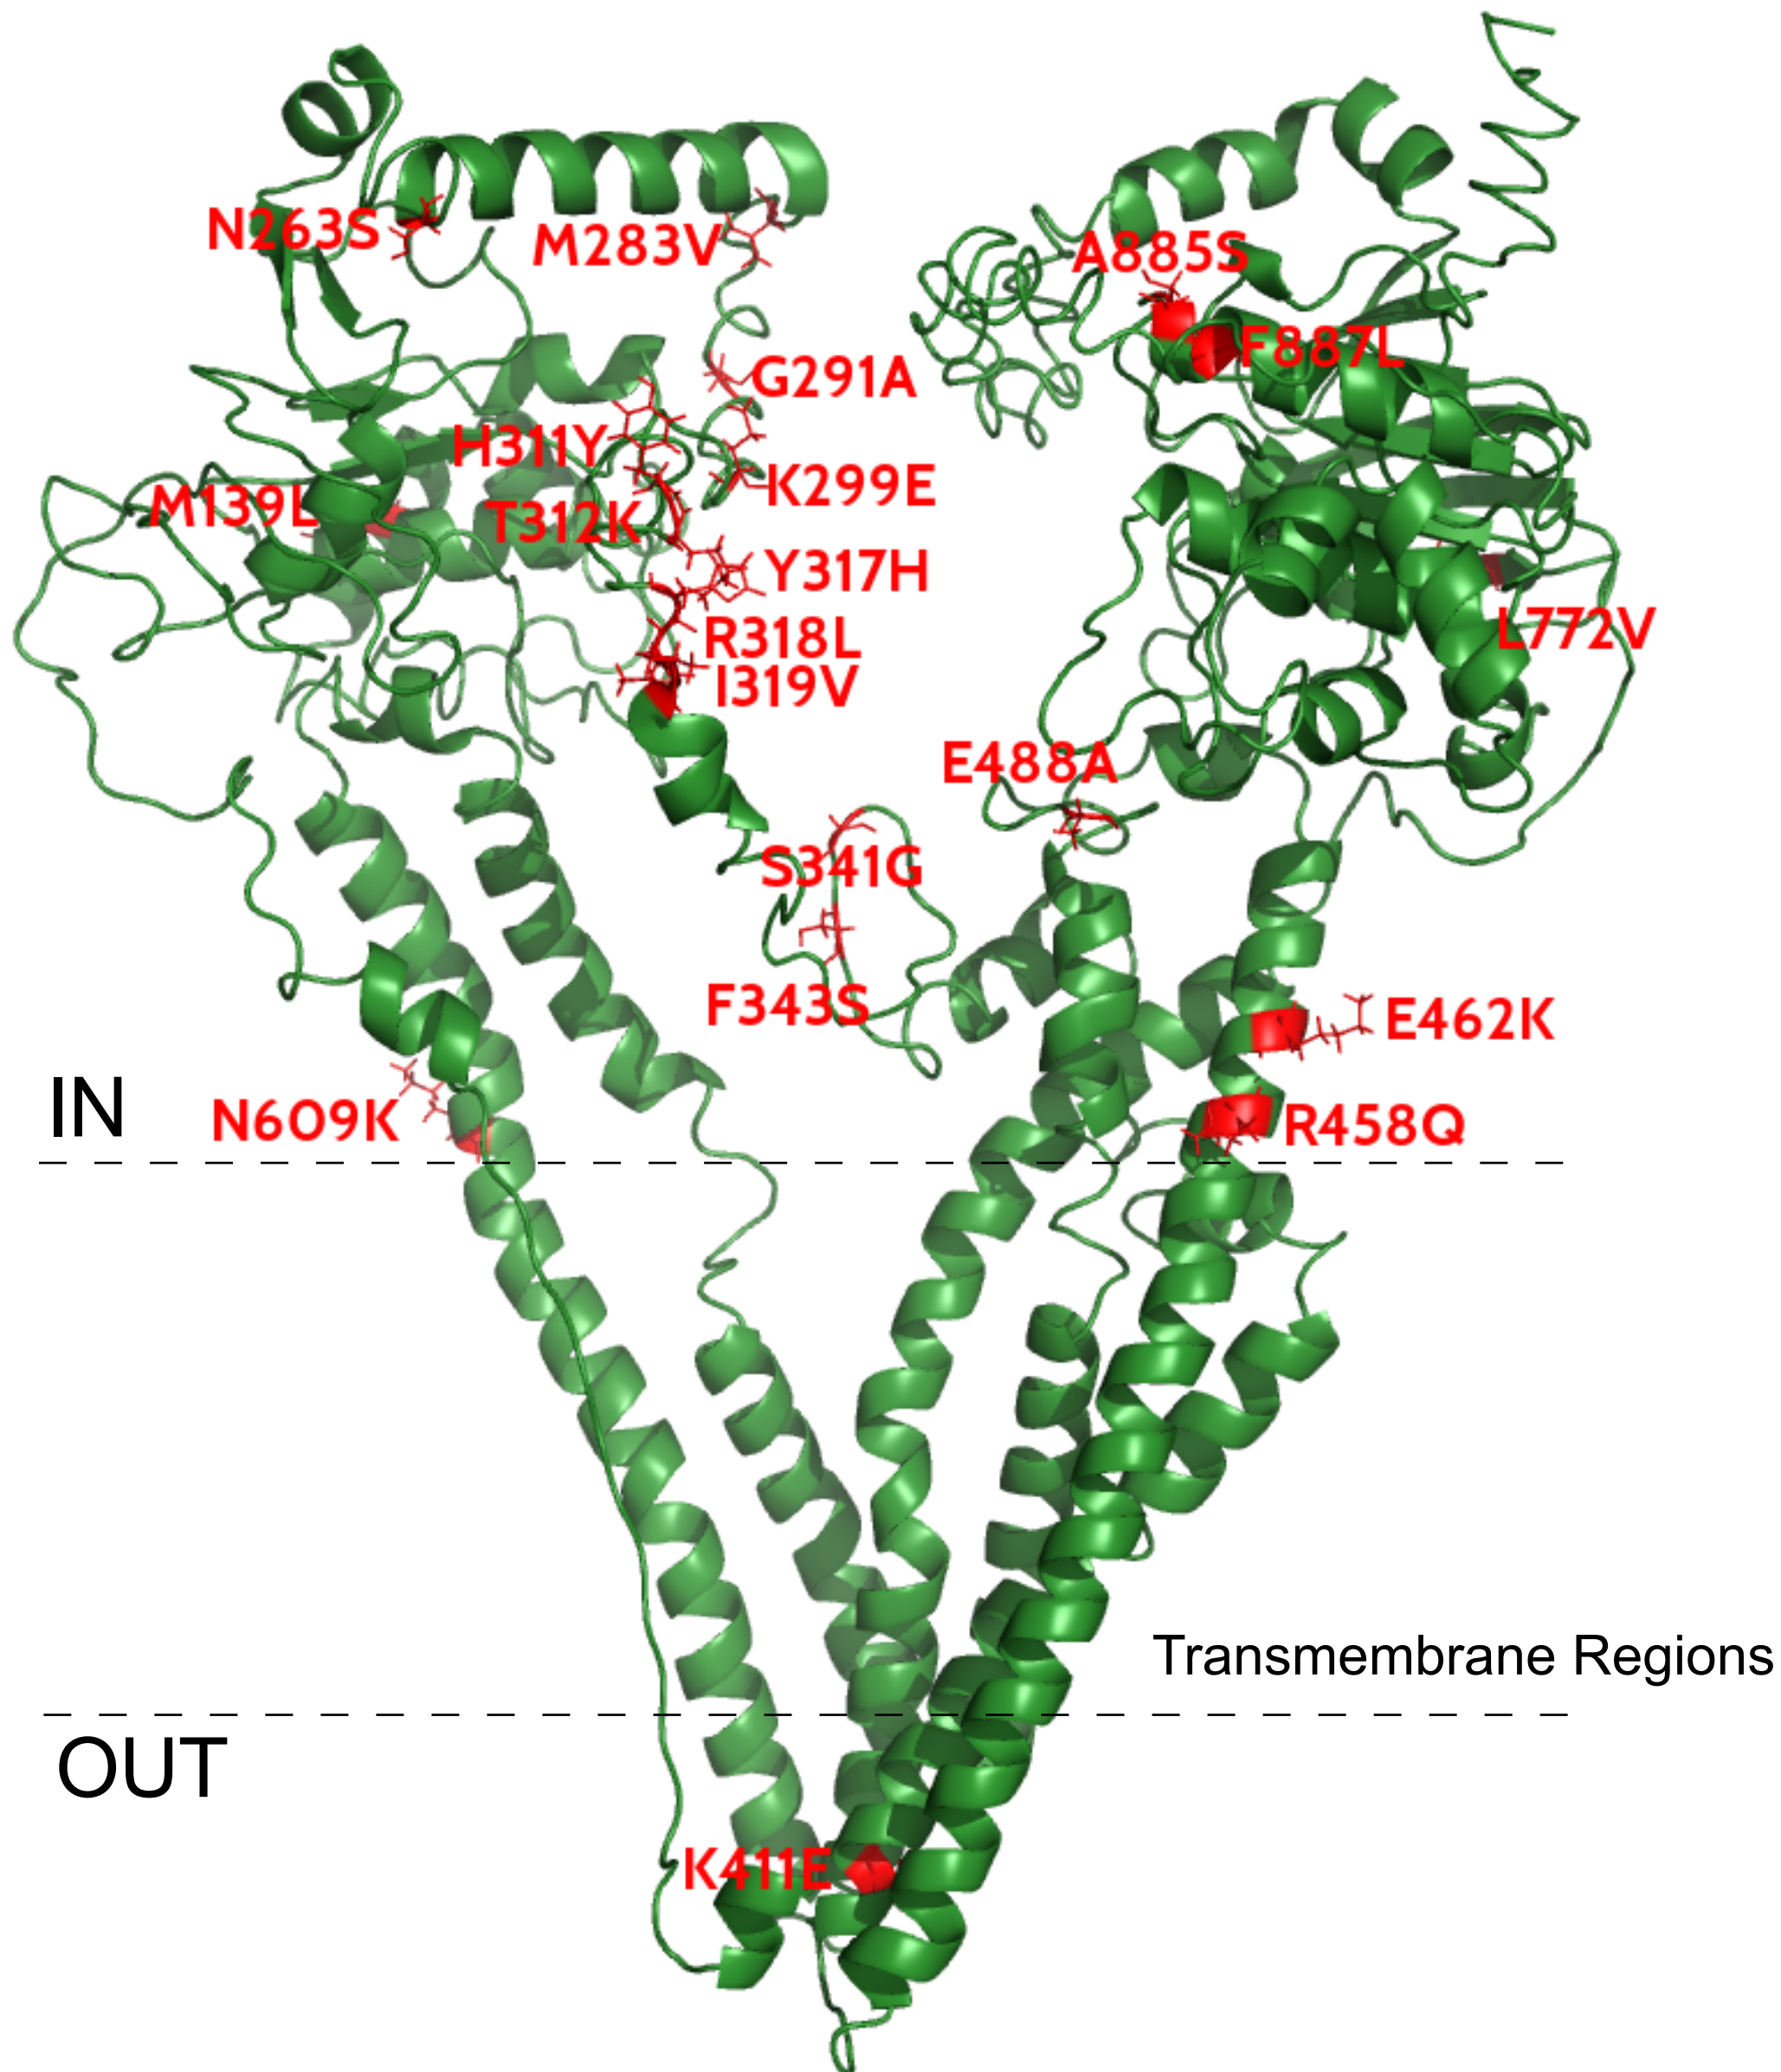

Supplement: Supplementary file 6 [file 7871780]

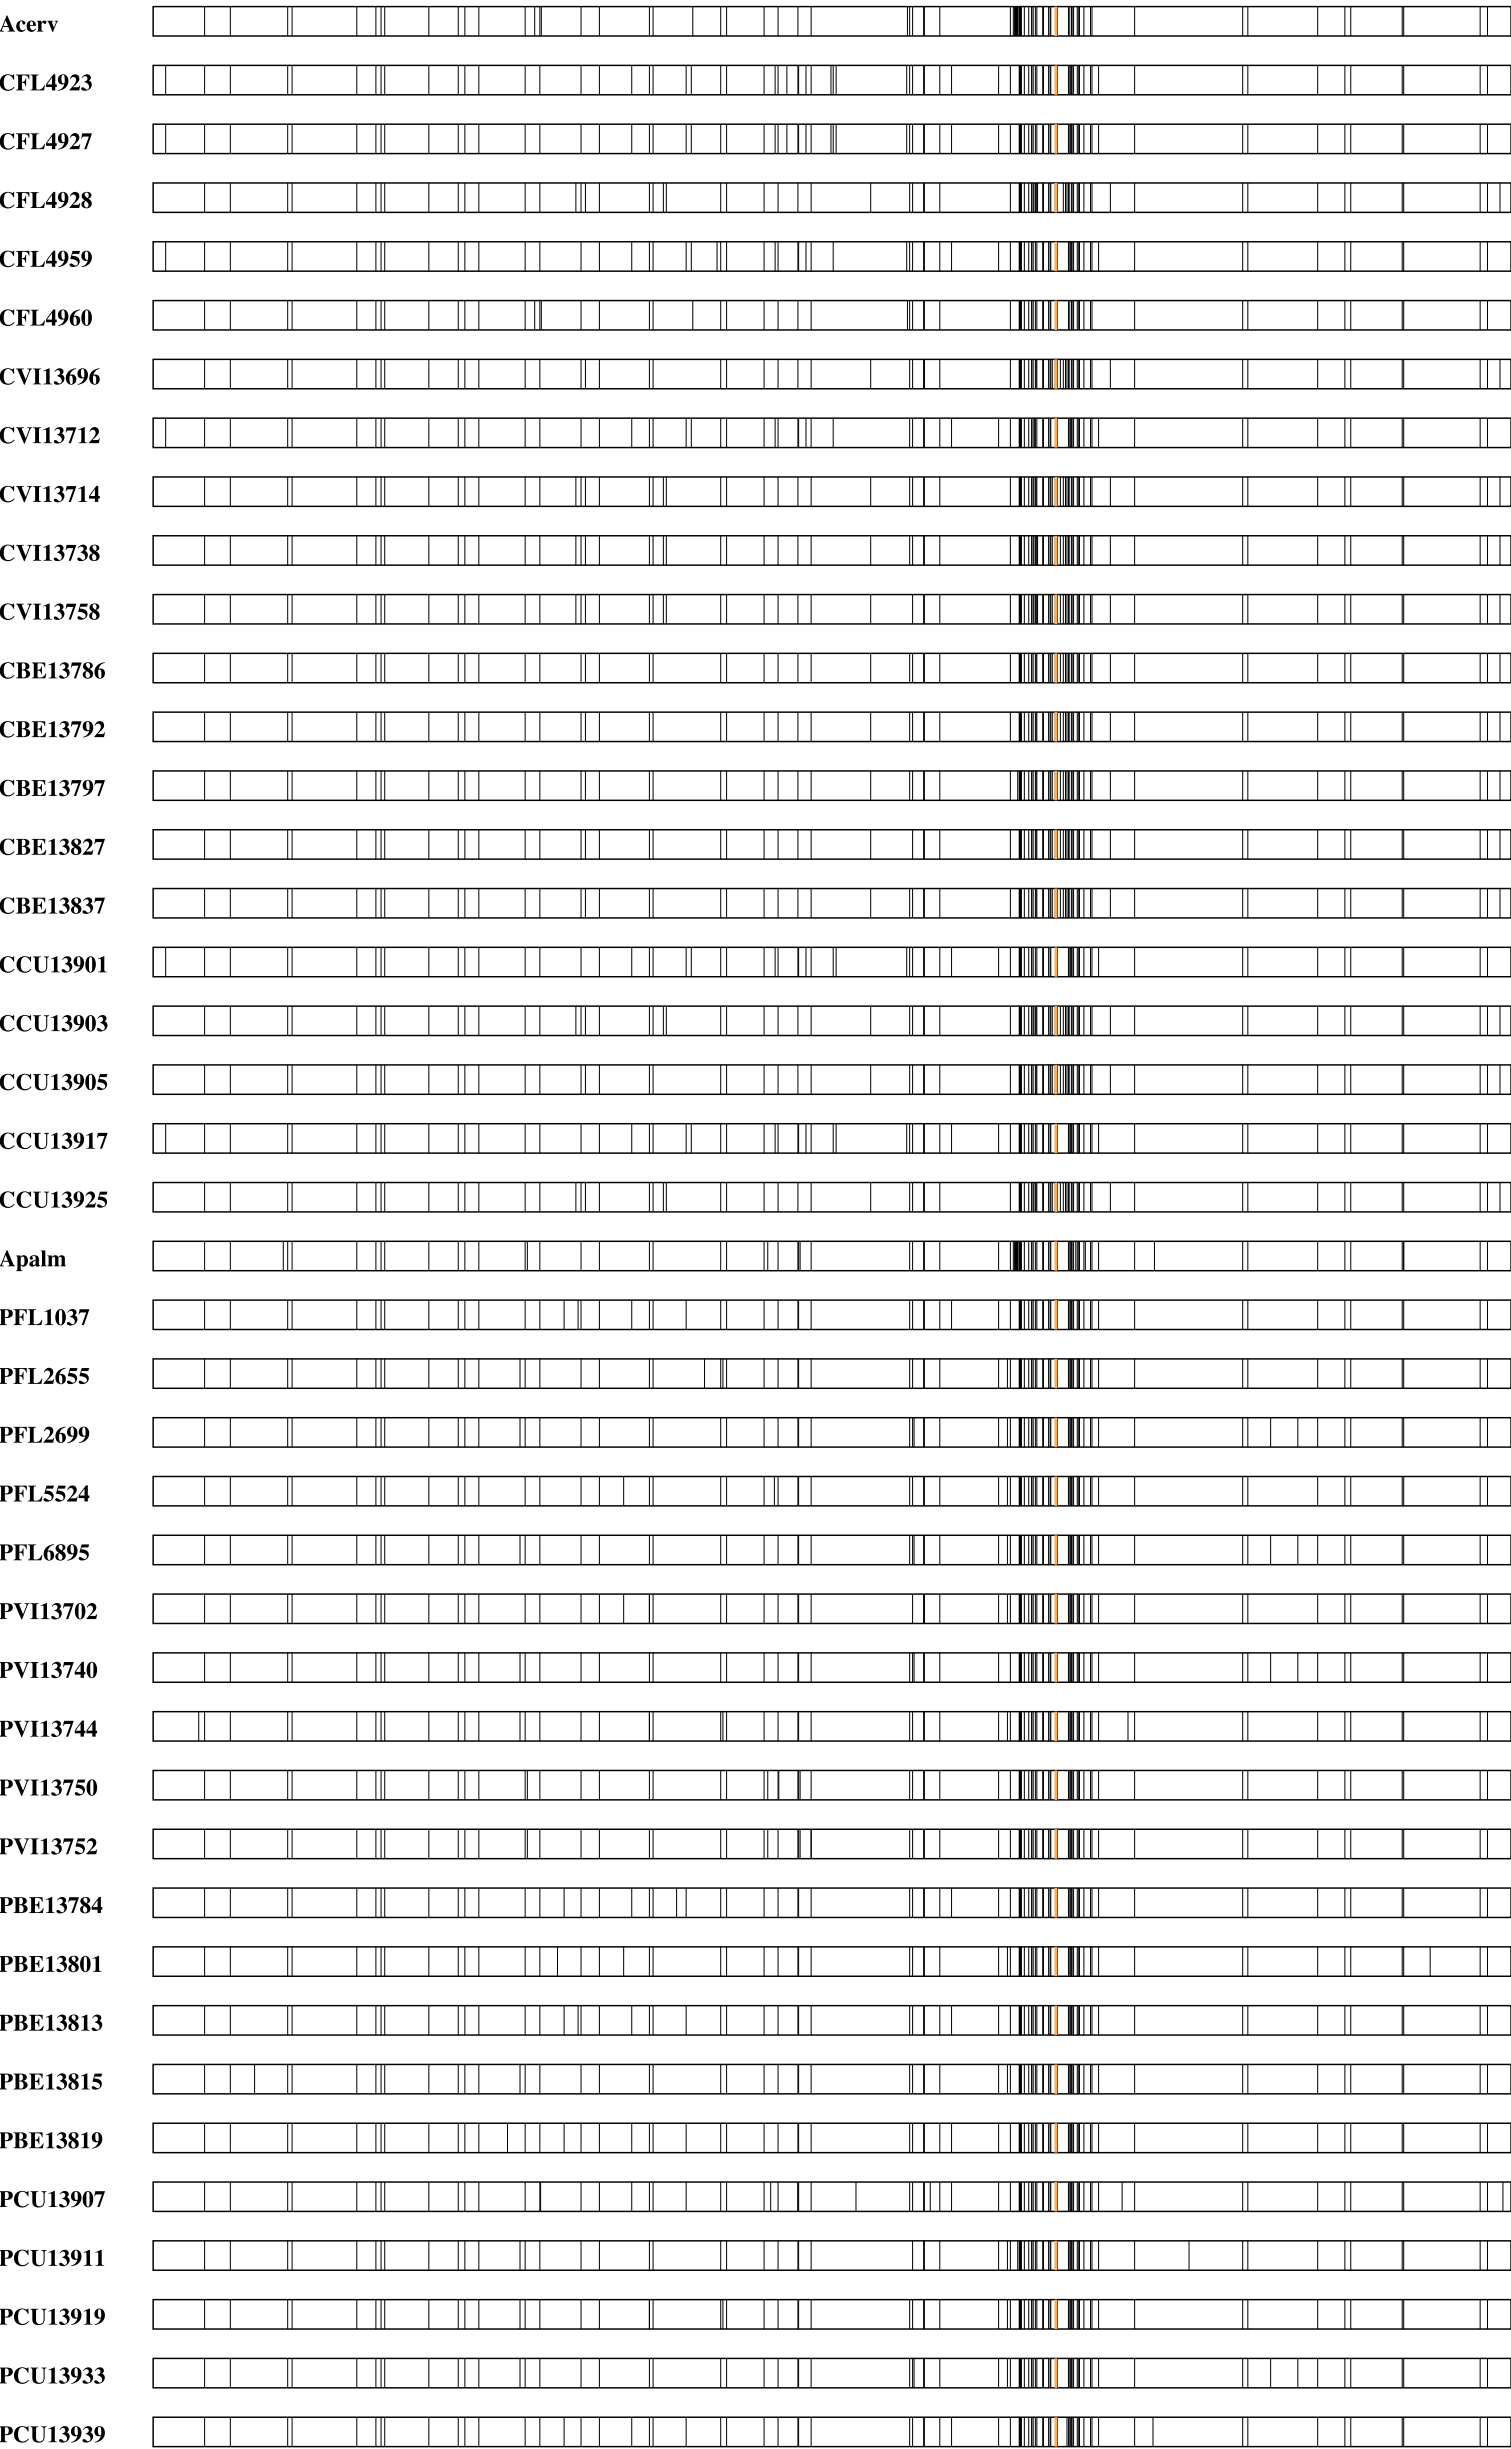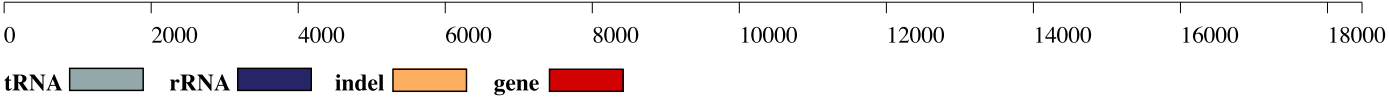

Supplement: Supplementary file 13 [file 7871780]
